# Supplementary material
Source: PubMed Central journal article supplement (PMC4472571)

**Supplementary Information for:**

**Receptive range analysis of a mouse odorant receptor subfamily**

**Jingyi Li, Rafi Haddad, Vanessa Santos, Selvan Bavan, Charles W. Luetje**

**Supplementary Table 1.**

Composition of odorant mixtures (with CAS numbers) used in Figure 1.

| <b>Mixture 1</b>                                                                                                                                                                                                          | <b>Mixture 2</b>                                                                                                                                                                                                                                      | <b>Mixture 3</b>                                                                                                                                                                                                                              | <b>Mixture 4</b>                                                                                                                                                                                                                 |
|---------------------------------------------------------------------------------------------------------------------------------------------------------------------------------------------------------------------------|-------------------------------------------------------------------------------------------------------------------------------------------------------------------------------------------------------------------------------------------------------|-----------------------------------------------------------------------------------------------------------------------------------------------------------------------------------------------------------------------------------------------|----------------------------------------------------------------------------------------------------------------------------------------------------------------------------------------------------------------------------------|
| (-)-carvone (6485-40-1)<br>(-)-isopulegol (89-79-2)<br>(+)-citronellal (2385-77-5)<br>benzyl cinnamate (103-41-3)<br>1,4-cineole (470-67-7)<br>D-Camphor (464-49-3)<br>trans,trans-2,4-octadienal<br>(5577-44-6)          | (-)-carvyl acetate (97-42-7)<br>(-)-citronellal (5949-05-3)<br>(-)-dihydrocarveol (20549-47-7)<br>(-)-limonene (5989-54-8)<br>(+)-carvone (2244-16-8)<br>2,5-dimethylpyrazine (123-32-0)<br>2-acetylfuran (1192-62-7)<br>2-acetylpyridine (1122-62-9) | (-)-menthol (2216-51-5)<br>(-)-carveol (99-48-9)<br>(+)-dihydrocarvone (7764-50-3)<br>(+)-isopulegol (104870-56-6)<br>2-heptanone (110-43-0)<br>2-isobutylthiazole (18640-74-9)<br>2-methylanisole (578-58-5)<br>benzyl salicylate (118-58-1) | (-)-menthone (14073-97-3)<br>(+)-limonene (5989-27-5)<br>2-nonanone (821-55-6)<br>2-pentanol (6032-29-7)<br>4-pentenoic acid (591-80-0)<br>5-methylfurfural (620-02-0)<br>amyl acetate (628-63-7)<br>$\alpha$ -ionone (127-41-3) |
| <b>Mixture 5</b>                                                                                                                                                                                                          | <b>Mixture 6</b>                                                                                                                                                                                                                                      | <b>Mixture 7</b>                                                                                                                                                                                                                              |                                                                                                                                                                                                                                  |
| anisole (100-66-3)<br>$\alpha$ -pinene (80-56-8)<br>cinnamaldehyde (104-55-2)<br>cinnamic acid (140-10-3)<br>citral (5392-40-5)<br>cuminaldehyde (122-03-2)<br>diethyl succinate (123-25-1)<br>ethyl 2-furoate (614-99-3) | ethyl butyrate (105-54-4)<br>ethyl octanoate (106-32-1)<br>geraniol (106-24-1)<br>geranyl acetate (105-87-3)<br>guaiacol (90-05-1)<br>hydrocinnamaldehyde (104-53-0)<br>isoamyl acetate (123-92-2)<br>isopentylamine (107-85-7)                       | linalool (78-70-6)<br>phenylacetic acid (103-82-2)<br>piperidine (110-89-4)<br>pyrrolidine (123-75-1)<br>trans-2-hexenal (6728-26-3)<br>trans-2-hexen-1-ol (928-95-0)<br>veratrole (91-16-7)                                                  |                                                                                                                                                                                                                                  |

## Supplemental Table 2.

Composition of odorant mixtures (with CAS numbers) used in Figure 4. These mixtures contain all of the odorants from Figure 1, plus 101 additional odorants.

| Mixture 1                                                                                                                                                                                                                                                                                                                                                                                                                                                                                                                                                                                                                                  | Mixture 2                                                                                                                                                                                                                                                                                                                                                                                                                                                                                                                                                                                                   | Mixture 3                                                                                                                                                                                                                                                                                                                                                                                                                                                                                                                                                                                                               | Mixture 4                                                                                                                                                                                                                                                                                                                                                                                                                                                                                                                                                                                                                                                   |
|--------------------------------------------------------------------------------------------------------------------------------------------------------------------------------------------------------------------------------------------------------------------------------------------------------------------------------------------------------------------------------------------------------------------------------------------------------------------------------------------------------------------------------------------------------------------------------------------------------------------------------------------|-------------------------------------------------------------------------------------------------------------------------------------------------------------------------------------------------------------------------------------------------------------------------------------------------------------------------------------------------------------------------------------------------------------------------------------------------------------------------------------------------------------------------------------------------------------------------------------------------------------|-------------------------------------------------------------------------------------------------------------------------------------------------------------------------------------------------------------------------------------------------------------------------------------------------------------------------------------------------------------------------------------------------------------------------------------------------------------------------------------------------------------------------------------------------------------------------------------------------------------------------|-------------------------------------------------------------------------------------------------------------------------------------------------------------------------------------------------------------------------------------------------------------------------------------------------------------------------------------------------------------------------------------------------------------------------------------------------------------------------------------------------------------------------------------------------------------------------------------------------------------------------------------------------------------|
| (-)-ambroxide (6790-58-5)<br>(-)-carvyl acetate (97-42-7)<br>(-)-limonene (5989-54-8)<br>1-hexanethiol (111-31-9)<br>2-acetylfuran (1192-62-7)<br>2-methylpentanoic acid (97-61-0)<br>2-pentanol (6032-29-7)<br>2,3-dimethylpyrazine (5910-89-4)<br>benzyl salicylate (118-58-1)<br>butylamine (109-73-9)<br>ethyl octanoate (106-32-1)<br>furfuryl isopropyl sulfide (1883-78-9)<br>linalool (78-70-6)<br>methyl phenylacetate (101-41-7)<br>p-cresol (106-44-5)<br>phenethylamine (64-04-0)<br>piperidine (110-89-4)                                                                                                                     | (+)-limonene (5989-27-5)<br>2-acetylpyrazine (22047-25-2)<br>2-acetylthiazole (24295-03-2)<br>2-heptanol (543-49-7)<br>2-methylanisole (578-58-5)<br>2-pentanone (107-87-9)<br>2,3,5,6-tetramethylpyrazine (1124-11-4)<br>4-pentenoic acid (591-80-0)<br>allyl butyrate (2051-78-7)<br>anisyl alcohol (105-13-5)<br>cinnamyl formate (104-65-4)<br>isopentylamine (107-85-7)<br>linalyl formate (115-99-1)<br>nerolidol (7212-44-4)<br>propyl disulfide (629-19-6)<br>propyl formate (110-74-7)<br>pyrrolidine (123-75-1)<br>$\alpha$ -pinene (80-56-8)                                                     | (-)-menthone (14073-97-3)<br>(+)-citronellal (2385-77-5)<br>2-acetylpyridine (1122-62-9)<br>2-ethoxythiazole (15679-19-3)<br>2-methyl butanal (96-17-3)<br>2-nonanol (628-99-9)<br>2-nonanone (821-55-6)<br>2-phenylpropionaldehyde (93-53-8)<br>2,5-dimethylpyrazine (123-32-0)<br>3-heptanone (106-35-4)<br>4-allylanisole (140-67-0)<br>allyl heptanoate (142-19-8)<br>cinnamic acid (140-10-3)<br>cinnamyl alcohol (104-54-1)<br>citral (5392-40-5)<br>furfuryl heptanoate (39481-28-2)<br>geranyl acetate (105-87-3)<br>guaiacol (90-05-1)<br>propyl mercaptan (107-03-9)<br>trans-cinnamaldehyde (14371-10-9)     | (-)-fenchone (7787-20-4)<br>(-)- $\beta$ -pinene (18172-67-3)<br>(+)-carvone (2244-16-8)<br>(+)-isopulegol (104870-56-6)<br>2-ethylpyrazine (13925-00-3)<br>2-isobutylthiazole (18640-74-9)<br>2-thiophenethiol (7774-74-5)<br>2,3-pentanedione (600-14-6)<br>3-heptanol (589-82-2)<br>3-nonanone (925-78-0)<br>3-phenyl-1-propanol (122-97-4)<br>allyl tiglate (7493-71-2)<br>anisole (100-66-3)<br>cuminaldehyde (122-03-2)<br>heptyl butyrate (5870-93-9)<br>isobutyl phenylacetate (102-13-6)<br>phenylacetic acid (103-82-2)<br>$\gamma$ -Octalactone (104-50-7)<br>trans,trans-2,4-heptandienal (4313-03-5)<br>trans,trans-2,4-octadienal (5577-44-6) |
| Mixture 5                                                                                                                                                                                                                                                                                                                                                                                                                                                                                                                                                                                                                                  | Mixture 6                                                                                                                                                                                                                                                                                                                                                                                                                                                                                                                                                                                                   | Mixture 7                                                                                                                                                                                                                                                                                                                                                                                                                                                                                                                                                                                                               | Mixture 8                                                                                                                                                                                                                                                                                                                                                                                                                                                                                                                                                                                                                                                   |
| (-)-carvone (6485-40-1)<br>(-)-isopulegol (89-79-2)<br>(+)-dihydrocarvone (7764-50-3)<br>1-nonanol (143-08-8)<br>1,9-nonanedithiol (3489-28-9)<br>2-mercaptopropionic acid (79-42-5)<br>2-pentylfuran (3777-69-3)<br>3-octen-2-one (18402-82-9)<br>5-methyl-2-phenyl-2-hexenal (21834-92-4)<br>5-phenyl-1-pentanol (10521-91-2)<br>amyl acetate (628-63-7)<br>diphenyl ether (101-84-8)<br>farnesal (19317-11-4)<br>isobornyl propionate (2756-56-1)<br>myrcene (123-35-3)<br>nonyl acetate (143-13-5)<br>octyl isobutyrate (109-15-9)<br>trans-2-hexenal (6728-26-3)<br>trans-2-hexenoic acid (13419-69-7)<br>$\alpha$ -ionone (127-41-3) | (-)-carveol (99-48-9)<br>(-)-citronellal (5949-05-3)<br>(+)-menthone (3391-87-5)<br>2,4-dimethylthiazole (541-58-2)<br>3-methylthio butanal (16630-52-7)<br>3-penten-2-one (625-33-2)<br>allyl-2-furoate (4208-49-5)<br>anisyl acetate (104-21-2)<br>cis-4-decenal (21662-09-9)<br>citronellol (106-22-9)<br>citronellyl valerate (7540-53-6)<br>eucalyptol (470-82-6)<br>heptyl acetate (112-06-1)<br>hydrocinnamaldehyde (104-53-0)<br>phenylacetaldehyde (122-78-1)<br>pinacol (76-09-5)<br>prenyl acetate (1191-16-8)<br>skatole (83-34-1)<br>theaspirane (36431-72-8)<br>trans-2-heptenal (18829-55-5) | (-)-dihydrocarveol (20549-47-7)<br>(-)-menthol (2216-51-5)<br>1-octene-3-one (4312-99-6)<br>4-ethylguaiacol (2785-89-9)<br>4-oxoisophorone (1125-21-9)<br>5-methylfurfural (620-02-0)<br>allyl mercaptan (870-23-5)<br>benzyl butyrate (103-37-7)<br>D-Camphor (464-49-3)<br>diethyl succinate (123-25-1)<br>ethyl 2-furoate (614-99-3)<br>farnesol (4602-84-0)<br>hydroxycitronellal (107-75-5)<br>isoamyl acetate (123-92-2)<br>methyl-2-nonenoate (111-79-5)<br>p-cymene (99-87-6)<br>p-tolyl phenylacetate (101-94-0)<br>safranal (116-26-7)<br>trans-2-methyl-2-pentenoic acid (16957-70-3)<br>veratrole (91-16-7) | (S)-(-)-perillyl alcohol (18457-55-1)<br>1,4-cineole (470-67-7)<br>2-heptanone (110-43-0)<br>2-methyl pentanal (123-15-9)<br>6-methyl-5-hepten-2-one (110-93-0)<br>allyl sulfide (592-88-1)<br>benzyl cinnamate (103-41-3)<br>carvacrol (499-75-2)<br>dimethyl anthranilate (85-91-6)<br>ethyl butyrate (105-54-4)<br>geraniol (106-24-1)<br>hexyl isobutyrate (2349-07-7)<br>indole (120-72-9)<br>isopropyl tiglate (1733-25-1)<br>o-methoxycinnamaldehyde (1504-74-1)<br>p-tolyl acetate (140-39-6)<br>terpinyl formate (2153-26-6)<br>thymol (89-83-8)<br>trans-3-hexenoic acid (1577-18-0)<br>$\gamma$ -terpinene (99-85-4)                             |

**Supplemental Table 3.**

**Sequence comparisons for MORs in this study.** Amino acid sequences were aligned using ClustalW. Amino acid identity (or identity + similarity) is presented as a percentage for each pair of receptor sequences.

|               | <b>263-3</b> | <b>263-9</b> | <b>263-10</b> | <b>104-2</b> | <b>165-2</b> | <b>171-17</b> |
|---------------|--------------|--------------|---------------|--------------|--------------|---------------|
| <b>263-2</b>  | 48 (62)      | 48 (62)      | 48 (62)       | 42 (62)      | 41 (61)      | 43 (61)       |
| <b>263-3</b>  |              | 90 (93)      | 91 (94)       | 40 (57)      | 38 (55)      | 39 (54)       |
| <b>263-9</b>  |              |              | 90 (93)       | 39 (57)      | 38 (54)      | 39 (55)       |
| <b>263-10</b> |              |              |               | 40 (58)      | 38 (55)      | 40 (55)       |
| <b>104-2</b>  |              |              |               |              | 38 (58)      | 40 (61)       |
| <b>165-2</b>  |              |              |               |              |              | 60 (72)       |

**Supplementary Figure 1. Functional expression of MORs without an N-terminal extension. A,** Oocytes expressing MOR31-4, MOR42-2, MOR174-9, or MOR267-13, as well as  $G\alpha_{\text{off}}$  and CFTR, were challenged with 15 sec applications of 1 mM IBMX (IB) and a cognate ligand: 100  $\mu\text{M}$  undecanedioic acid (UDA) for MOR31-4, 100  $\mu\text{M}$  heptanoic acid (H) for MOR42-2, 100  $\mu\text{M}$  eugenol (EG) for MOR174-9, 30  $\mu\text{M}$  lyral (Ly) for MOR267-13. The oocyte expressing MOR267-13 was also exposed to 0.06% DMSO (D). **B)** An oocyte expressing MOR174-9,  $G\alpha_{\text{off}}$  and CFTR was challenged with 100  $\mu\text{M}$  butanol (B), eugenol (EG), (-)-carvone (-C), vanillin (Van), Geraniol (GE), ethyl vanillin (EV) and 1mM IBMX. **C)** Responses of MOR174-9 expressing oocytes to eugenol, vanillin and ethyl vanillin (each at 100  $\mu\text{M}$ ) are normalized to the response of the same oocyte to 1 mM IBMX (mean  $\pm$  SEM,  $n=6-10$ ). **D)** An oocyte expressing MOR174-9,  $G\alpha_{\text{off}}$  and CFTR was challenged with 30  $\mu\text{M}$  eugenol (EG), 100  $\mu\text{M}$  methylisoeugenol (MIEG), 30  $\mu\text{M}$  eugenol plus 100  $\mu\text{M}$  methylisoeugenol, followed by 30  $\mu\text{M}$  eugenol again. Responses to eugenol in the presence of 100  $\mu\text{M}$  methylisoeugenol were  $36 \pm 3\%$  of the response to eugenol alone (mean  $\pm$  SEM,  $n=5$ ). **E)** An oocyte expressing MOR42-2,  $G\alpha_{\text{off}}$  and CFTR was challenged with 100  $\mu\text{M}$  of monocarboxylic acids of varying carbon length (C6-C10). **F)** Responses of MOR42-2 expressing oocytes to 100  $\mu\text{M}$  of monocarboxylic acids (C6-C10) are normalized to the response of the same oocyte to 100  $\mu\text{M}$  octanoic acid (mean  $\pm$  SEM,  $n=4$ ). **G)** An oocyte expressing MOR42-2,  $G\alpha_{\text{off}}$  and CFTR was challenged with 100  $\mu\text{M}$  of dicarboxylic acids of varying carbon length (C6-C10) and octanoic acid (OA).

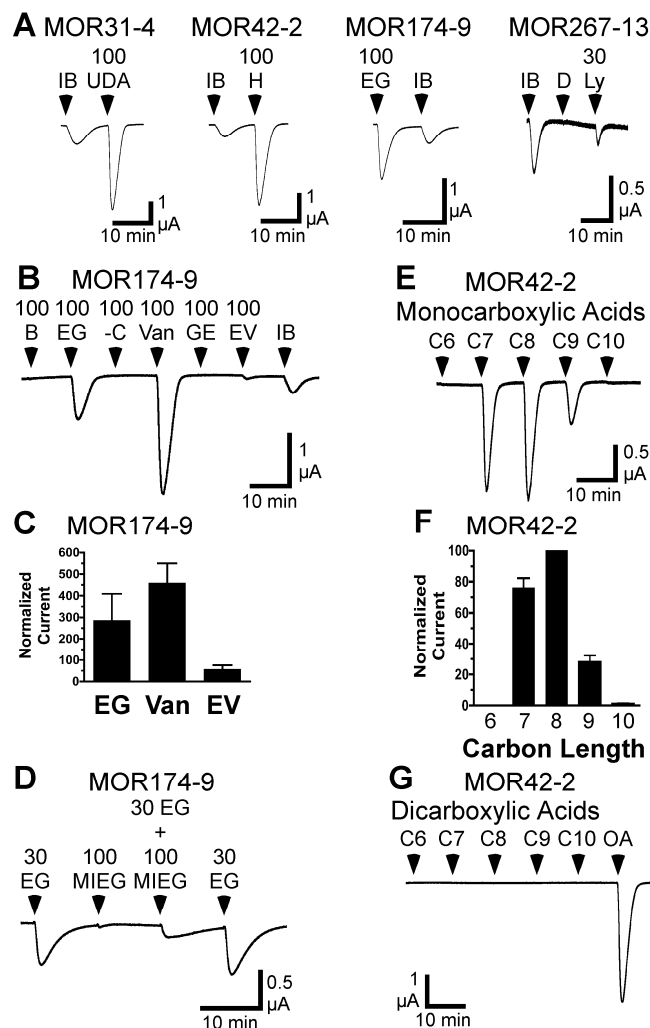

**Supplementary Figure 2. Concentration–response analysis of MOR263-3 activation by *trans,trans*-2,4-octadienal (ODL).**

Current responses of oocytes expressing MOR263-3,  $G\alpha_{\text{off}}$  and CFTR to a range of ODL concentrations were normalized to the response of the same oocyte to application of 1  $\mu\text{M}$  ODL. Normalized data were then fit as described in Experimental Procedures ( $EC_{50} = 21 \pm 6 \mu\text{M}$ , Hill coefficient =  $0.98 \pm 0.17$ ,  $n = 4$ ).

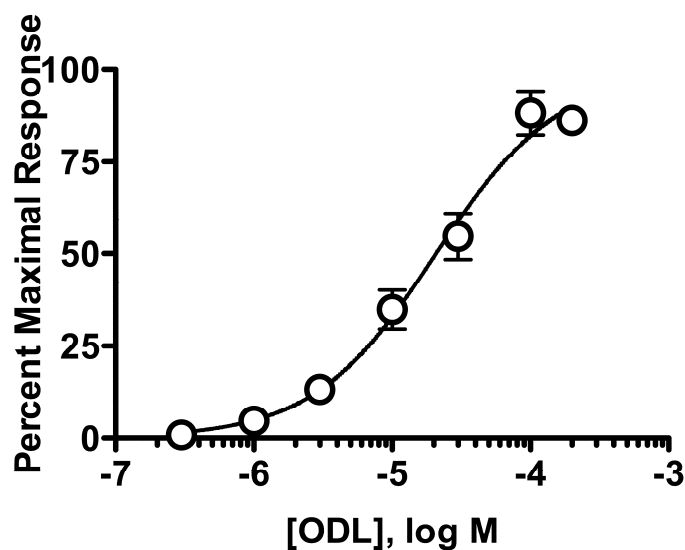

Supplement: NIHMS673332-supplement-Supp_TableS1___Figure_S1-S2.pdf [file NIHMS673332-supplement-Supp_TableS1___Figure_S1-S2.pdf]
